# Supplementary material
Source: Springer Nature journal article supplement (https://www.springermedizin.de/resource/supplementary/12885_2010_2531_MOESM10_ESM.pdf/9462230)

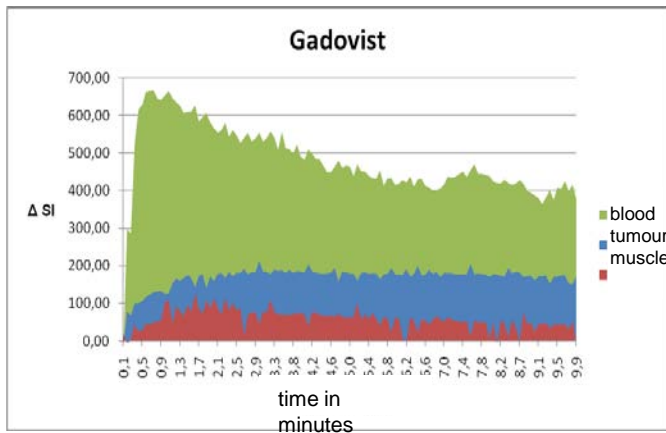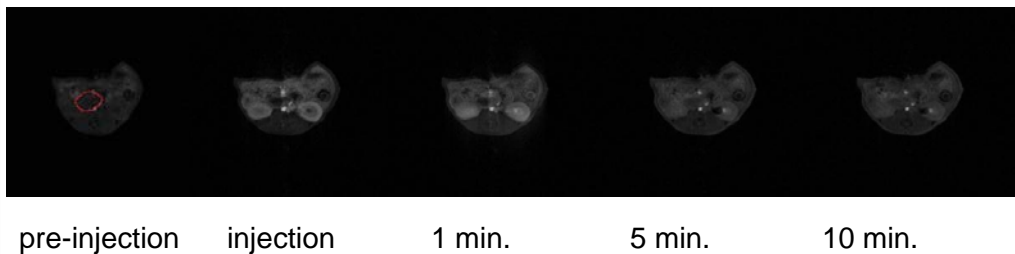

Supplement: MOESM10 [file 9462230]
